# Supplementary material for: Large-scale shifts in phytoplankton groups in the Equatorial Pacific during ENSO cycles
Source: Copernicus journal article supplement (doi:10.5194/bg-8-539-2011), 2011-03-04
Supplement: Supplementary file 1 [file bg-8-539-2011-supplement.pdf]

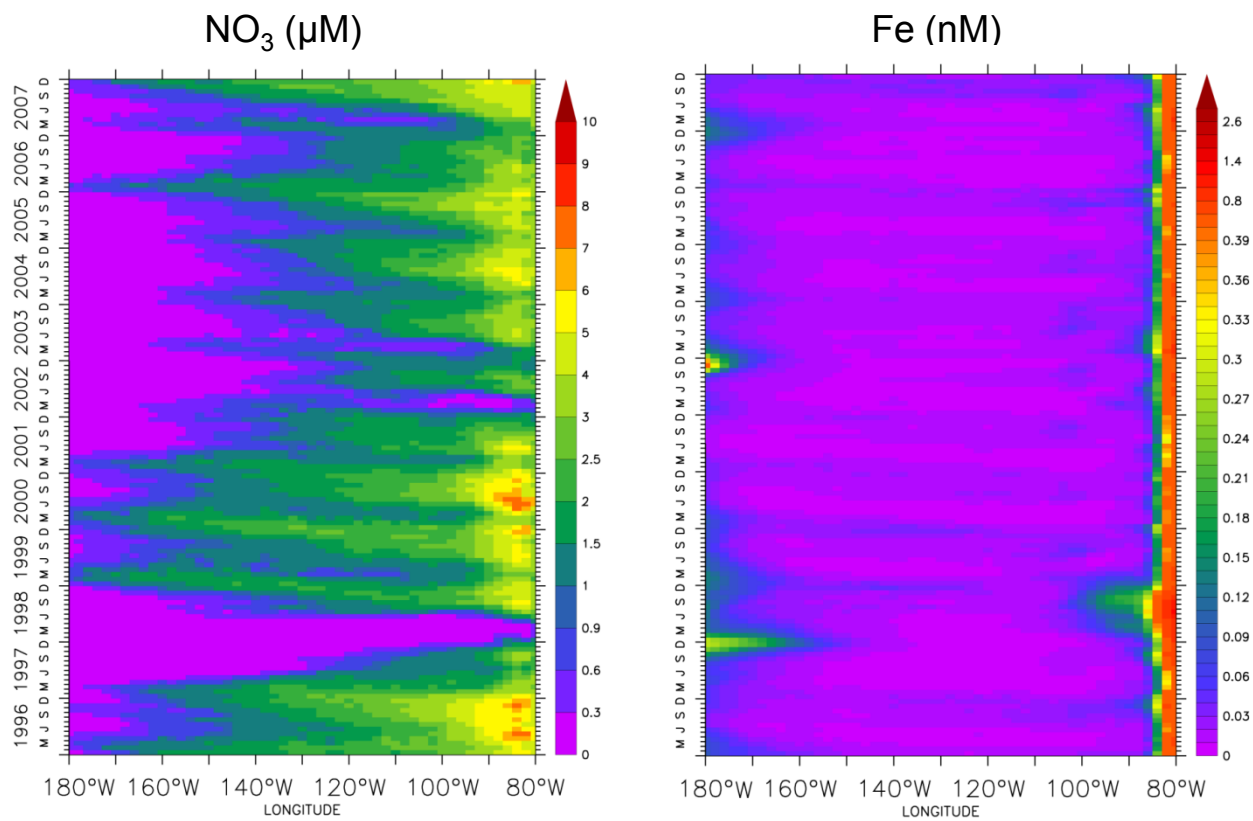

Fig. S1. Longitude-time plots of the NO<sub>3</sub> (left panel) and Fe (right panel) concentration in the Equatorial Pacific region (10°N-10°S) over 1996- 2007.

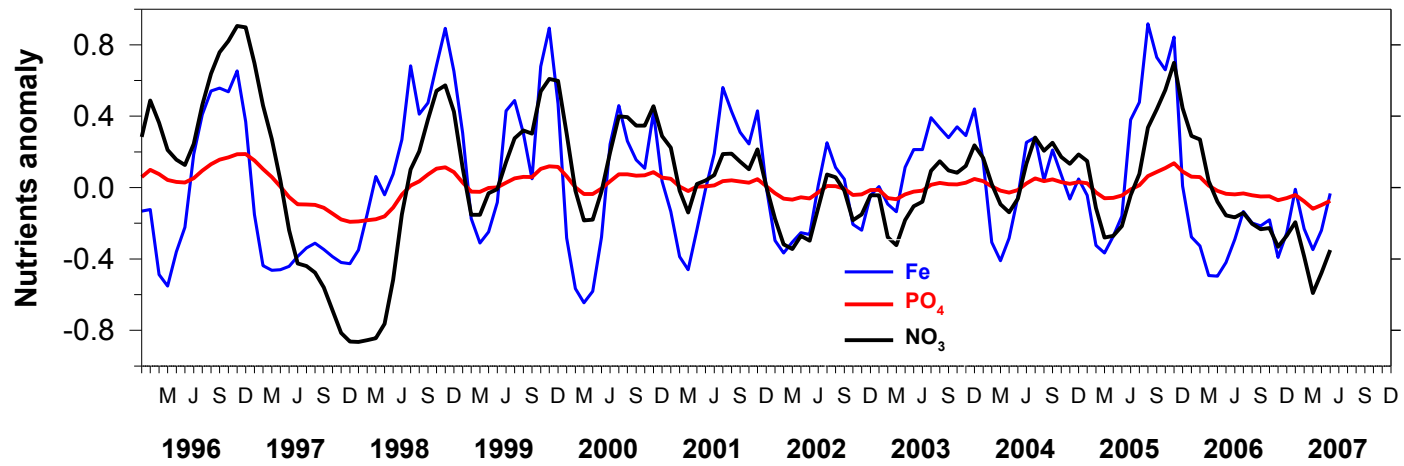

Fig. S2. Anomaly of nutrients in the core of the PFT shift region (140°W-100°W, 10°N-10°S) during ENSO cycles.

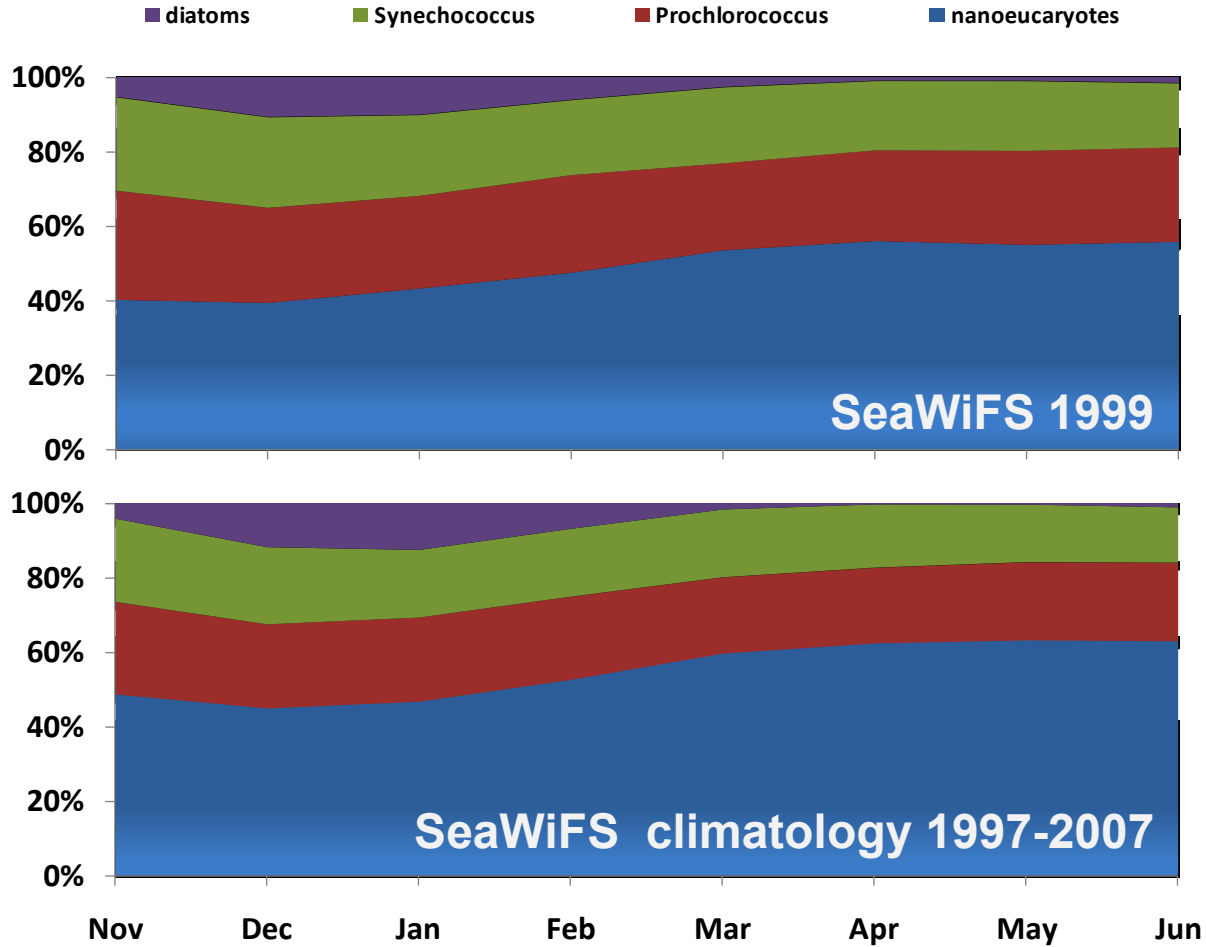

Fig. S3. A comparison of the monthly areal coverage (in percentage) by each PFT obtained from SeaWiFS 1999 year (upper panel) and SeaWiFS climatology between 1997-2007 (bottom panel).
